# Supplementary material for: Cardiomyocyte-Restricted Deletion of PPARβ/δin PPARα-Null Mice Causes Impaired Mitochondrial Biogenesis and Defense, but No Further Depression of Myocardial Fatty Acid Oxidation
Source: Hindawi journal article supplement (doi:10.1155/2011/372854), 2011-01-01
Supplement: f1 [file 372854.f1.pdf]

**Supplemental Table 1: Primers used in the present study**

| Gene     | Forward                       | Reverse                       |
|----------|-------------------------------|-------------------------------|
| b-actin  | 5'CTGTCCCTGTATGCCTCTG 3'      | 5'ATGTCACGCACGATTTCC 3'       |
| FABP-h   | 5'TCGAGAAGAACGGGGATAC 3'      | 5'CTGCCATGGGTGAGAGT 3'        |
| CD36     | 5'AAAGTTGCCATAATTGAGTCCT 3'   | 5'TCCGAACACAGCGTAGATAGA 3'    |
| ACS      | 5'GCAAGAAGTGTGGGGTGGAAATCA 3' | 5'CATATGGGCGAGAGGCAAGAAAGA 3' |
| Acadm    | 5'ACTCGCTAGGCTCAGTTACCA 3'    | 5'GTCCCTCATCAGCTTCTCCACA 3'   |
| Acadl    | 5'CCGCCCGATGTTCTCATTCTG 3'    | 5'TCTGCGATGTTGATGCCAAGC 3'    |
| MCD      | 5'ATGAGGCTGTGTGCCTGGTA 3'     | 5'TTGCTGTTGTTCTGGAAGTGG 3'    |
| Cpt1b    | 5'TTCAACACTACACGCATCCC 3'     | 5'GCCCTCATAGAGCCAGACC 3'      |
| Cpt II   | 5'GCTCCGAGGCATTTGTC 3'        | 5'CATCGCTGCTTCTTTGGT 3'       |
| UCP2     | 5'TTGTTTTCAAGGCCACAGAT 3'     | 5'TACCCAGAACGCCACGGTA 3'      |
| GPAT     | 5'GGAGTGTGGCGAGAGGCGTTATC 3'  | 5'TTGCTGGCGGTGAAGAGAATGTG 3'  |
| PFK      | 5'GCCGTGTTGACCTCTGG 3'        | 5'TCGTCCTTCTCGCTCCC 3'        |
| HK2      | 5'TTTTAGGTGAGTCGGCGTTTC 3'    | 5'CTCGATGCAGCTCAGTCCAAG 3'    |
| Glut1    | 5'GAAGAGGGTCGGCAGATGA 3'      | 5'CGAAGATGCTCGTTGAGTAGTAGA 3' |
| Glut4    | 5'TTCCAGCAGATCGGCTCTGA 3'     | 5'AAGACATTGTTGGCCAGCAT 3'     |
| PPARa    | 5'ATTTCCCTCTTTGTGGCTGCTAT 3'  | 5'GCGTCGGACTCGGTCTTCTTGAT 3'  |
| PPARd    | 5'TCGGGCTTCCACTACGG 3'        | 5'ACTGACACTTGTTGCGTTCT 3'     |
| PPARg    | 5'GCCATTGAGTGCCGAGTCTGT 3'    | 5'GCATCCGCCCAAACCTGA 3'       |
| SOD1     | 5'GGAAGCATGGCGATGAAA 3'       | 5'AAATGAGGTCCTGCACTGGTA 3'    |
| SOD2     | 5'GCCTCCCAGACCTGCCTTAC 3'     | 5'TCGGTGGCGTTGAGATTGT 3'      |
| catalase | 5'AAGGTTTGGCCTCACAAGGA 3'     | 5'GCGGTAGGGACAGTTCACAG 3'     |
| TFAM     | 5'AGCAGCAGGCACTACAGCGATAC 3'  | 5'TTCCCATTCCCTTCCCAGAC 3'     |
| PGC1a    | 5'TGTTCCCGATCACCATATTCC 3'    | 5'TCCCCTTCTCGTGCTCTTT 3'      |
| PGC1b    | 5'AGGTGTTTCGGTGAGATTGTA 3'    | 5'TCAGATGTGGGATCATAGTCA 3'    |
| NRF1     | 5'CATGGAGGAGCACGGAGTGA 3'     | 5'AGCAGCCAGATGGGCAGTTA 3'     |
| NRF2a    | 5'ACGGCACCAAGCACATTACGAC 3'   | 5'GAACTCCTTCATTACCCAAACC 3'   |
| NRF2b    | 5'GTGTGGGGGGCGGGGTAT 3'       | 5'CCTGGCTCTGAGGGGTTT 3'       |
| Mfn2     | 5'AAGTCCGGGAAGCTGAAAGT 3'     | 5'TCTCGGTTATGGAACCAACC 3'     |
| DRP1     | 5'CAGCCCAAGGACATCG 3'         | 5'TGGCATCAGTACCCGC 3'         |
| FIS1     | 5'CTGAGCCCCAGAACAACCA 3'      | 5'CCCTCTCCAGTGTCCTCC 3'       |
| Cox2     | 5'ACCTGGTGAAGTACGACTGCTA 3'   | 5'GTCGGTTTGATGTTACTGTTGC 3'   |
| Cox3     | 5'GCAGGATTCTTCTGAGCGTTCTA 3'  | 5'AGGGCTTGATTTATGTGGTTTCGT 3' |
| Cytob    | 5'ATGACAGATCAAAGATAGCCAAGC 3' | 5'GCACAGGAGGAAAGGGAAAC 3'     |
| Cyto c   | 5'GCCTCTATTTCAACCCTTACTTT 3'  | 5'TGACCACTTATGCCGCTTC 3'      |
| Thiolase | 5'AAGACCTGATTGTAAGACGG 3'     | 5'CACTGAGATGGTGTGGGAG 3'      |
