# Supplementary material for: Cardiomyocyte-Restricted Deletion of PPARβ/δin PPARα-Null Mice Causes Impaired Mitochondrial Biogenesis and Defense, but No Further Depression of Myocardial Fatty Acid Oxidation
Source: Hindawi journal article supplement (doi:10.1155/2011/372854), 2011-01-01
Supplement: f2 [file 372854.f2.pdf]

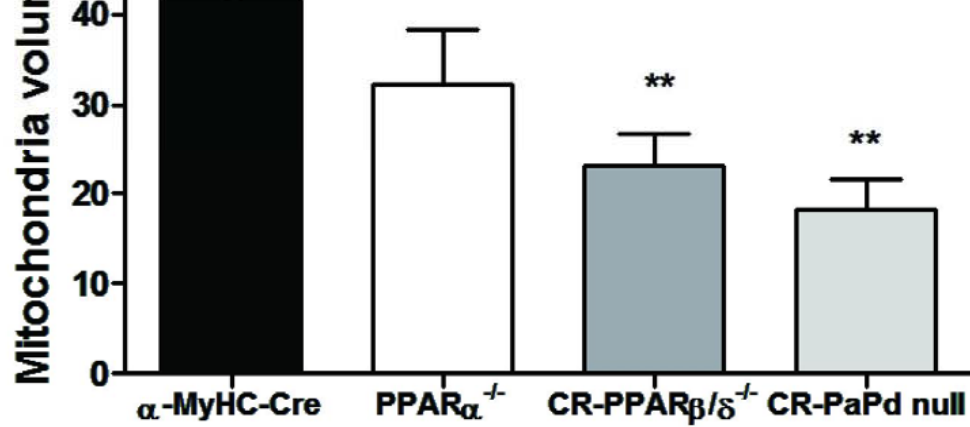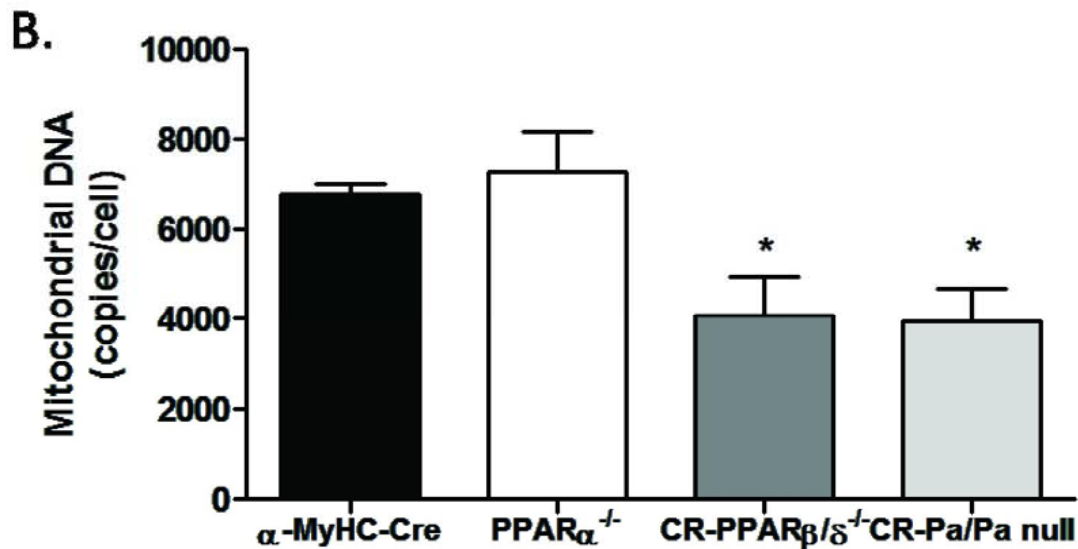

**Sup. Figure 1 Mitochondrial volume and DNA copy number** **A)** Volume of mitochondria analyzed on electron micrographs (x12000) of  $\alpha$ -MyHC-Cre,  $PPAR\alpha^{-/-}$ , CR- $PPAR\beta/\delta^{-/-}$ , CR-Pd/Pa null heart sections. Samples are from ventricular tissues of 4-month-old mice. The volume of mitochondria was expressed as a percentage of the total area in the TEM micrographs. Data are from 4-7 randomly selected images. **B)** The Mitochondrial DNA copy number on samples from  $\alpha$ -MyHC-Cre,  $PPAR\alpha^{-/-}$ , CR- $PPAR\beta/\delta^{-/-}$ , CR-Pd/Pa null hearts. \* $p < 0.05$  vs  $\alpha$ -MyHC-Cre, and \*\* $p < 0.01$  vs  $\alpha$ -MyHC-Cre, n=6.
